# Supplementary material for: Anastomotic Height Is a Valuable Indicator of Long-term Bowel Function Following Surgery for Rectal Cancer
Source: PubMed Central journal article supplement — Dis Colon Rectum. 2022 Dec 13;66(2):221–32. doi: 10.1097/DCR.0000000000002168 (PMC9829038; doi:10.1097/dcr.0000000000002168), 2022-12-13
Supplement: dcr-66-221-s002.pdf [file dcr-66-221-s002.pdf]

## Supplemental Digital Content 1. Dropout analysis

| Variables                           | Responders<br>No. (%) | Non-responders <sup>a</sup><br>No. (%) | <i>p</i> value |
|-------------------------------------|-----------------------|----------------------------------------|----------------|
| Overall                             | 656 (100.0)           | 103 (100.0)                            |                |
| Male                                | 407 (62.0)            | 60 (58.3)                              | 0.462          |
| Age at surgery (years) <sup>b</sup> | 65.0 (58.0 - 69.0)    | 67.0 (58.5 - 73.5)                     | 0.025*         |
| Follow-up (months) <sup>b,c</sup>   | 56.5 (39.0 - 80.0)    | 61.0 (44.5 - 78.0)                     | 0.282          |
| ASA score at surgery                |                       |                                        |                |
| I                                   | 201 (31.4)            | 21 (20.8)                              | 0.142          |
| II                                  | 367 (57.3)            | 66 (65.3)                              |                |
| III                                 | 69 (10.8)             | 14 (13.9)                              |                |
| IV                                  | 3 (0.5)               | 0 (0.0)                                |                |
| Previous abdominal surgery          | 128 (19.5)            | 20 (19.4)                              | 0.982          |
| Tumor stage (UICC)                  |                       |                                        |                |
| I                                   | 240 (36.6)            | 42 (40.8)                              | 0.781          |
| II                                  | 207 (31.6)            | 30 (29.1)                              |                |
| III                                 | 189 (28.9)            | 27 (26.2)                              |                |
| IV                                  | 19 (2.9)              | 4 (3.9)                                |                |

<sup>a</sup> The clinical data of the non-responders was obtained from the Dutch ColoRectal Audit registry.

<sup>b</sup> Values are expressed as median (IQR)

<sup>c</sup> Follow-up since primary rectum or rectosigmoid cancer surgery

\* Statistical significance of  $p < 0.05$

Abbreviations: ASA, American Society of Anesthesiologists; UICC, Union for International Cancer Control.
