# Supplementary material for: Anastomotic Height Is a Valuable Indicator of Long-term Bowel Function Following Surgery for Rectal Cancer
Source: PubMed Central journal article supplement — Dis Colon Rectum. 2022 Dec 13;66(2):221–32. doi: 10.1097/DCR.0000000000002168 (PMC9829038; doi:10.1097/dcr.0000000000002168), 2022-12-13
Supplement: dcr-66-221-s003.pdf [file dcr-66-221-s003.pdf]

**Supplemental Digital Content 2. Univariable logistic regression of constipation, fecal incontinence, and major LARS**

| Variables                                    | Constipation        |                | Fecal incontinence  |                | Major LARS          |                |
|----------------------------------------------|---------------------|----------------|---------------------|----------------|---------------------|----------------|
|                                              | Odds ratio (95% CI) | <i>p</i> value | Odds ratio (95% CI) | <i>p</i> value | Odds ratio (95% CI) | <i>p</i> value |
| <b>Anastomotic height (cm)</b>               | 1.10 (1.05 – 1.14)  | <0.001**       | 0.87 (0.82 – 0.91)  | <0.001**       | 0.85 (0.80 – 0.89)  | <0.001**       |
| <b>Sex</b>                                   |                     |                |                     |                |                     |                |
| Men                                          | Reference           |                | Reference           |                | Reference           |                |
| Women                                        | 1.35 (0.96 – 1.91)  | 0.088          | 0.75 (0.51 – 1.10)  | 0.139          | 0.82 (0.58 – 1.18)  | 0.285          |
| <b>Age at surgery (years)</b>                | 1.00 (0.98 – 1.02)  | 0.824          | 0.98 (0.96 – 1.00)  | 0.026*         | 0.99 (0.97 – 1.01)  | 0.149          |
| <b>Follow-up (months)</b>                    | 1.00 (1.00 – 1.01)  | 0.302          | 1.00 (1.00 – 1.01)  | 0.525          | 1.00 (1.00 – 1.01)  | 0.486          |
| <b>BMI at surgery (kg/m<sup>2</sup>)</b>     | 1.00 (0.96 – 1.05)  | 0.911          | 1.01 (0.96 – 1.06)  | 0.669          | 1.03 (0.98 – 1.07)  | 0.257          |
| <b>ASA score at surgery</b>                  | 1.32 (1.01 – 1.74)  | 0.046*         | 0.76 (0.56 – 1.02)  | 0.065          | 1.00 (0.76 – 1.32)  | 0.995          |
| <b>Charlson comorbidity index at surgery</b> | 1.19 (0.91 – 1.58)  | 0.209          | 0.86 (0.62 – 1.21)  | 0.389          | 0.87 (0.63 – 1.19)  | 0.367          |
| <b>Previous lower abdominal surgery</b>      |                     |                |                     |                |                     |                |
| No                                           | Reference           |                | Reference           |                | Reference           |                |
| Yes                                          | 1.10 (0.74 – 1.62)  | 0.640          | 1.23 (0.81 – 1.85)  | 0.329          | 1.44 (0.98 – 2.11)  | 0.064          |
| <b>Previous upper abdominal surgery</b>      |                     |                |                     |                |                     |                |
| No                                           | Reference           |                | Reference           |                | Reference           |                |
| Yes                                          | 0.82 (0.44 – 1.53)  | 0.533          | 1.06 (0.56 – 2.00)  | 0.861          | 1.05 (0.58 – 1.91)  | 0.875          |
| <b>Smoking</b>                               |                     |                |                     |                |                     |                |
| No                                           | Reference           |                | Reference           |                | Reference           |                |
| Yes, or recently quit                        | 1.06 (0.67 – 1.68)  | 0.799          | 1.15 (0.70 – 1.88)  | 0.589          | 0.86 (0.53 – 1.38)  | 0.520          |
| <b>Tumor stage (UICC)</b>                    |                     |                |                     |                |                     |                |
| I - II                                       | Reference           |                | Reference           |                | Reference           |                |
| III - IV                                     | 1.18 (0.82 – 1.69)  | 0.367          | 1.19 (0.81 – 1.75)  | 0.375          | 0.94 (0.65 – 1.36)  | 0.726          |
| <b>Distant metastasis</b>                    |                     |                |                     |                |                     |                |
| No                                           | Reference           |                | Reference           |                | Reference           |                |
| Yes                                          | 0.76 (0.41 – 1.40)  | 0.377          | 0.79 (0.41 – 1.53)  | 0.482          | 1.41 (0.80 – 2.48)  | 0.238          |
| <b>Radiotherapy</b>                          |                     |                |                     |                |                     |                |
| No                                           | Reference           |                | Reference           |                | Reference           |                |
| Neoadjuvant short course                     | 0.65 (0.43 – 0.96)  | 0.032*         | 3.72 (2.37 – 5.84)  | <0.001**       | 6.06 (3.93 – 9.33)  | <0.001**       |
| Neoadjuvant long course                      | 0.58 (0.36 – 0.93)  | 0.025*         | 4.33 (2.63 – 7.14)  | <0.001**       | 4.35 (2.67 – 7.10)  | <0.001**       |
| <b>Adjuvant chemotherapy</b>                 |                     |                |                     |                |                     |                |
| No                                           | Reference           |                | Reference           |                | Reference           |                |
| Yes                                          | 1.65 (1.09 – 2.52)  | 0.019*         | 0.84 (0.52 – 1.36)  | 0.478          | 0.51 (0.31 – 0.84)  | 0.008*         |
| <b>Years since last radiotherapy</b>         | 1.02 (0.90 – 1.16)  | 0.713          | 1.08 (0.96 – 1.21)  | 0.188          | 1.02 (0.91 – 1.14)  | 0.748          |
| <b>Years since last chemotherapy</b>         | 1.01 (0.89 – 1.15)  | 0.867          | 1.07 (0.94 – 1.22)  | 0.302          | 1.08 (0.95 – 1.23)  | 0.217          |
| <b>Setting</b>                               |                     |                |                     |                |                     |                |
| Elective                                     | Reference           |                | Reference           |                | Reference           |                |
| Emergency                                    | 1.92 (0.82 – 4.53)  | 0.135          | 0.48 (0.14 – 1.65)  | 0.244          | 0.23 (0.05 – 0.98)  | 0.048*         |
| <b>Surgical approach</b>                     |                     |                |                     |                |                     |                |
| Open                                         | Reference           |                | Reference           |                | Reference           |                |
| Laparoscopic                                 | 1.37 (0.95 – 1.98)  | 0.093          | 0.66 (0.45 – 0.97)  | 0.032*         | 0.70 (0.49 – 1.01)  | 0.056          |
| Conversion                                   | 0.93 (0.46 – 1.86)  | 0.837          | 0.64 (0.31 – 1.31)  | 0.222          | 0.84 (0.44 – 1.62)  | 0.607          |

|                              |                    |        |                    |          |                     |          |
|------------------------------|--------------------|--------|--------------------|----------|---------------------|----------|
| <b>Method of anastomosis</b> |                    |        |                    |          |                     |          |
| Hand-sewn                    | Reference          |        | Reference          |          | Reference           |          |
| Stapled                      | 0.90 (0.41 – 1.97) | 0.798  | 1.35 (0.54 – 3.36) | 0.524    | 6.46 (1.52 – 27.40) | 0.011*   |
| <b>Type of anastomosis</b>   |                    |        |                    |          |                     |          |
| Side-to-end                  | Reference          |        | Reference          |          | Reference           |          |
| Side-to-side                 | 0.66 (0.21 – 2.05) | 0.476  | 0.61 (0.17 – 2.16) | 0.444    | 0.49 (0.14 – 1.74)  | 0.271    |
| End-to-end                   | 1.21 (0.77 – 1.92) | 0.412  | 0.98 (0.59 – 1.62) | 0.938    | 1.33 (0.84 – 2.09)  | 0.227    |
| <b>Temporary stoma</b>       |                    |        |                    |          |                     |          |
| No                           | Reference          |        | Reference          |          | Reference           |          |
| Yes                          | 0.65 (0.46 – 0.92) | 0.014* | 2.52 (1.72 – 3.69) | <0.001** | 3.56 (2.46 – 5.16)  | <0.001** |
| <b>Anastomotic leakage</b>   |                    |        |                    |          |                     |          |
| No                           | Reference          |        | Reference          |          | Reference           |          |
| Yes                          | 1.07 (0.53 – 2.18) | 0.845  | 3.18 (1.62 – 6.22) | 0.001**  | 2.34 (1.20 – 4.57)  | 0.013*   |
| <b>Reoperation</b>           |                    |        |                    |          |                     |          |
| No                           | Reference          |        | Reference          |          | Reference           |          |
| Yes                          | 0.90 (0.41 – 2.00) | 0.804  | 1.22 (0.55 – 2.69) | 0.627    | 1.43 (0.68 – 2.98)  | 0.346    |

\* Statistical significance of  $p < 0.05$

\*\* Statistical significance of  $p < 0.005$

Abbreviations: CI, confidence interval; LARS, low anterior resection syndrome; ASA, American Society of Anesthesiologists; UICC, Union for International Cancer Control.
