# Supplementary material for: Anastomotic Height Is a Valuable Indicator of Long-term Bowel Function Following Surgery for Rectal Cancer
Source: PubMed Central journal article supplement — Dis Colon Rectum. 2022 Dec 13;66(2):221–32. doi: 10.1097/DCR.0000000000002168 (PMC9829038; doi:10.1097/dcr.0000000000002168), 2022-12-13
Supplement: dcr-66-221-s004.pdf [file dcr-66-221-s004.pdf]

**Supplemental Digital Content 3. Univariable analysis of the use of defecation treatment according to anastomotic height**

| Type of defecation treatment            | Total     | Anastomotic height (cm) |                |
|-----------------------------------------|-----------|-------------------------|----------------|
|                                         | n (%)     | Odds ratio (95% CI)     | <i>p</i> value |
| <b>Management of constipation</b>       |           |                         |                |
| Use of laxatives                        | 98 (15.6) | 1.00 (0.95 – 1.06)      | 0.944          |
| Use of enemas                           | 7 (1.1)   | 0.97 (0.80 – 1.18)      | 0.745          |
| <b>Management of fecal incontinence</b> |           |                         |                |
| Use of antidiarrheals                   | 28 (4.4)  | 0.81 (0.71 – 0.91)      | <0.001**       |
| Use of colonic irrigation               | 15 (2.4)  | 0.81 (0.67 – 0.97)      | 0.022*         |

\* Statistical significance of  $p < 0.05$

\*\* Statistical significance of  $p < 0.005$

Abbreviations: CI, confidence interval; LARS, low anterior resection syndrome.
