# Supplementary material for: Anastomotic Height Is a Valuable Indicator of Long-term Bowel Function Following Surgery for Rectal Cancer
Source: PubMed Central journal article supplement — Dis Colon Rectum. 2022 Dec 13;66(2):221–32. doi: 10.1097/DCR.0000000000002168 (PMC9829038; doi:10.1097/dcr.0000000000002168), 2022-12-13
Supplement: dcr-66-221-s005.pdf [file dcr-66-221-s005.pdf]

**Supplemental Digital Content 4. Correlations between anastomotic height and quality of life**

| Quality of life domains    | Total score | Spearman correlation coefficient | <i>p</i> value |
|----------------------------|-------------|----------------------------------|----------------|
|                            | Mean (SD)   | <i>r</i>                         |                |
| Physical functioning       | 79.0 (23.8) | -0.115                           | 0.004**        |
| Role – physical            | 70.8 (27.6) | -0.055                           | 0.171          |
| Bodily pain                | 85.2 (20.5) | -0.081                           | 0.045*         |
| Mental health              | 77.9 (16.6) | -0.001                           | 0.977          |
| Role – emotional           | 80.1 (24.6) | -0.011                           | 0.786          |
| Social functioning         | 82.9 (22.1) | 0.002                            | 0.962          |
| Vitality                   | 65.0 (19.6) | -0.033                           | 0.421          |
| General health perceptions | 65.5 (18.6) | -0.035                           | 0.383          |

\* Statistical significance of  $p < 0.05$

\*\* Statistical significance of  $p < 0.005$
